# Supplementary material for: Sequencing of the complete mitochondrial genome of a fish-parasitic flatworm Paratetraonchoides inermis (Platyhelminthes: Monogenea): tRNA gene arrangement reshuffling and implications for phylogeny
Source: PubMed Central journal article supplement (PMC5633893; doi:10.1186/s13071-017-2404-1), 2017-10-10

*trnS1*-like

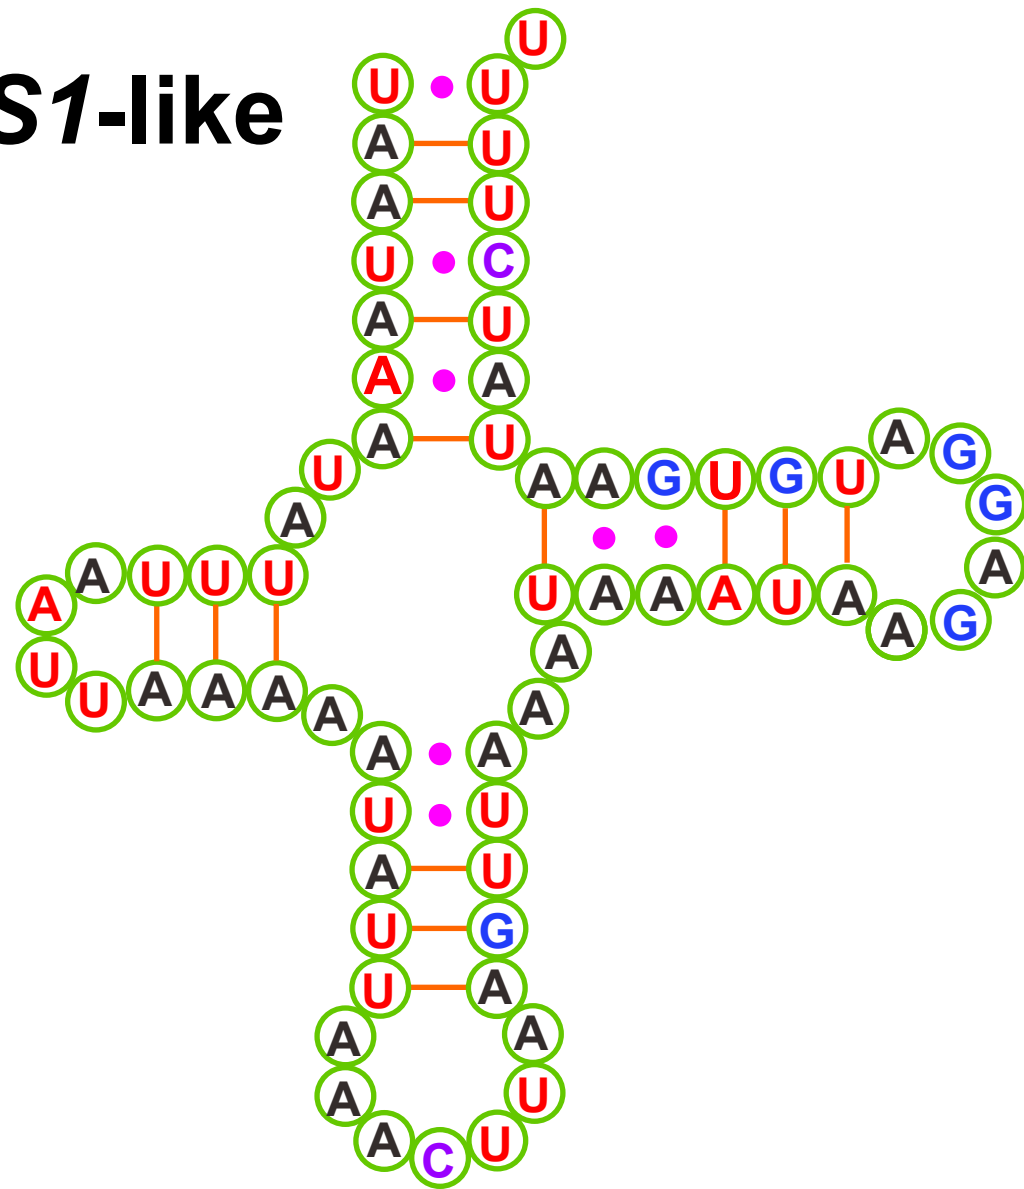

*trnL1*-like

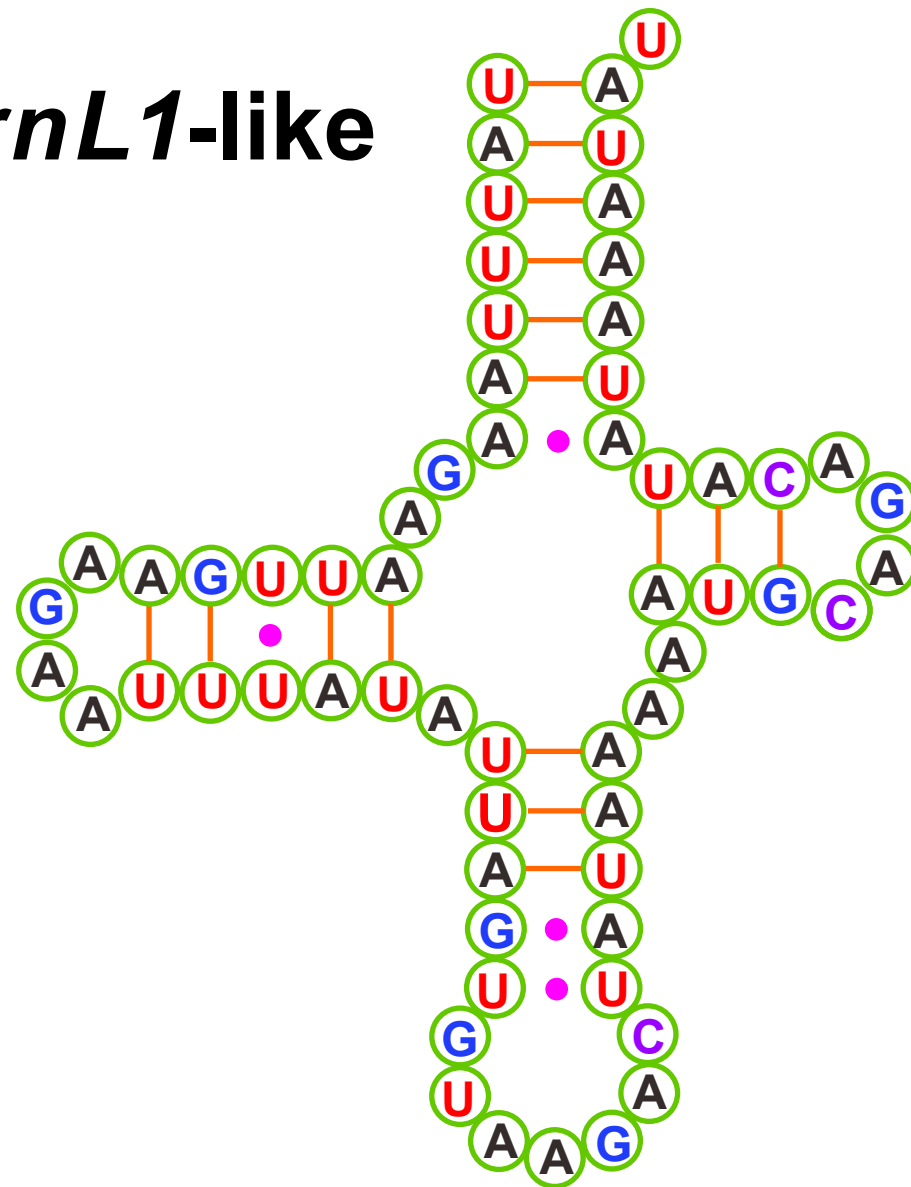

*trnL2*-like

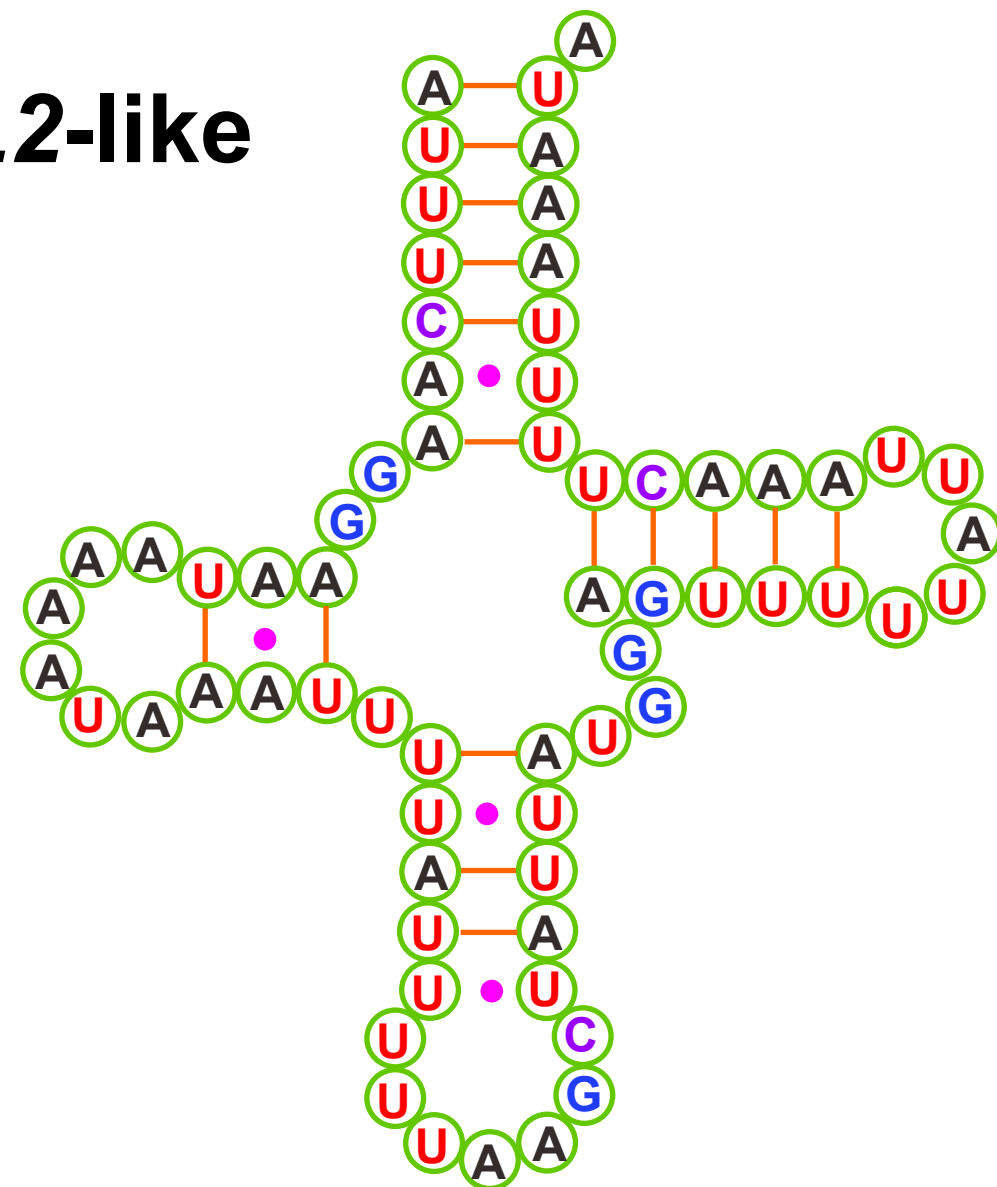

Supplement: 13071_2017_2404_MOESM3_ESM.pdf [file 13071_2017_2404_MOESM3_ESM.pdf]
