# Supplementary material for: Sequencing of the complete mitochondrial genome of a fish-parasitic flatworm Paratetraonchoides inermis (Platyhelminthes: Monogenea): tRNA gene arrangement reshuffling and implications for phylogeny
Source: PubMed Central journal article supplement (PMC5633893; doi:10.1186/s13071-017-2404-1), 2017-10-10
Supplement: 13071_2017_2404_MOESM5_ESM.pdf [file 13071_2017_2404_MOESM5_ESM.pdf]

*Paratetraonchoides inermis*

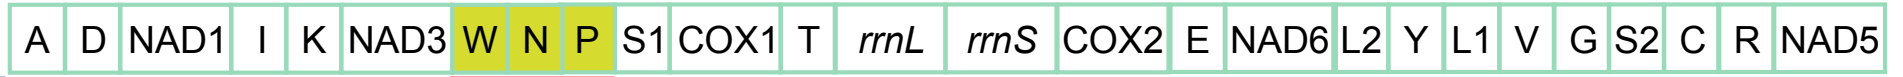

transposition

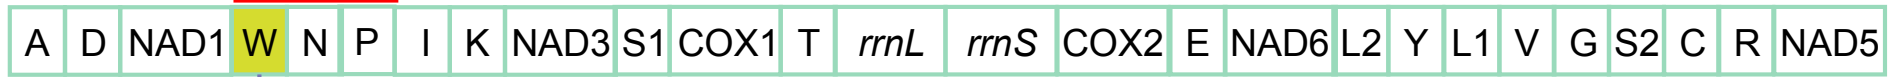

transposition

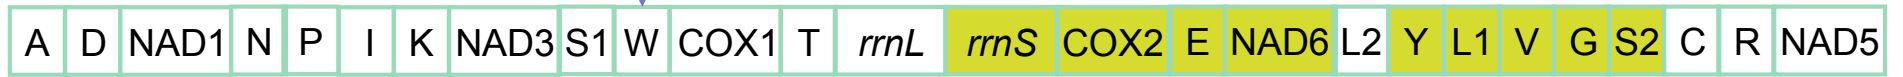

TDRL

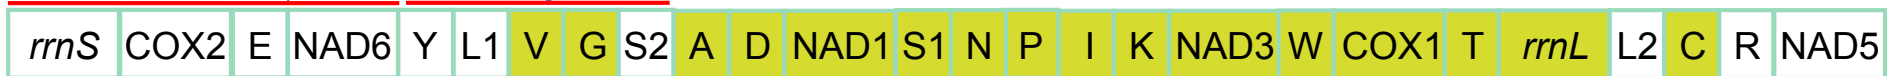

TDRL

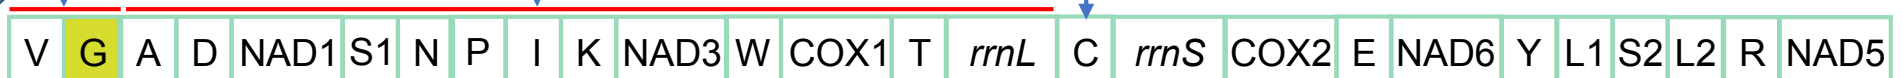

transposition

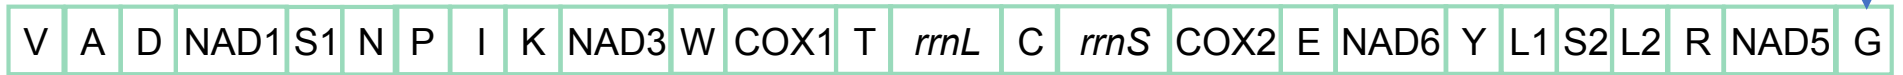

*Tetrancistrum nebulosi*
